# Supplementary material
Source: publisher figshare collection journal article supplement (https://acs.figshare.com/ndownloader/files/9068986)
Supplement: Supplementary file 1 [file 9068986]

## Supporting Information

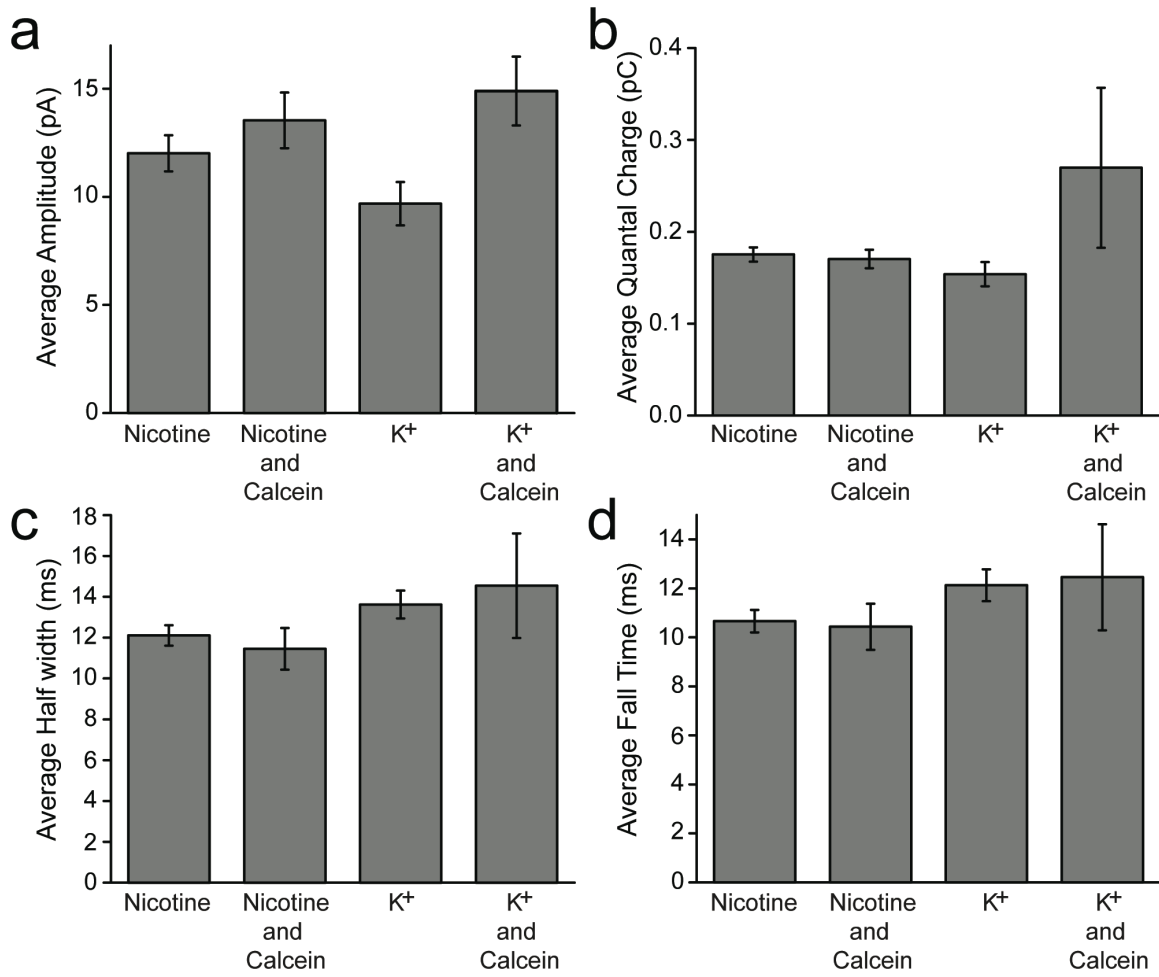

Figure S1. Average amperometry data are shown for comparison between stimulation with nicotine or  $K^+$  and with nicotine and  $K^+$  including calcein. The averaged data include the amperometry spike amplitude (a), quantal charge (b), half-width (c), and fall time (d) of the spike events from the data shown in Figure 2. There were no significant differences when the comparison was made between nicotine and nicotine + calcein, or  $K^+$  and  $K^+$  + calcein.
